# Supplementary material for: Single Application of Low-Dose, Hydroxyapatite-Bound BMP-2 or GDF-5 Induces Long-Term Bone Formation and Biomechanical Stabilization of a Bone Defect in a Senile Sheep Lumbar Osteopenia Model
Source: MDPI journal article supplement (doi:10.3390/biomedicines10020513), 2022-02-21
Supplement: s1 [file s1]

**Supplementary Table S2. Results of the linear mixed effects model for treatment (group), time point (time), BMP dose (dose), and area-related effects of BMP-2 or GDF-5.**

| Parameter                           |                           | Treatment (adjacent area 1) |                      |                    | Treatment (remote area 2) |                      |                    | group                        | time                    | dose                    | area                         | group*time       | group*dose              | group * area                 |
|-------------------------------------|---------------------------|-----------------------------|----------------------|--------------------|---------------------------|----------------------|--------------------|------------------------------|-------------------------|-------------------------|------------------------------|------------------|-------------------------|------------------------------|
|                                     |                           | HA vs. control              | HA-BMP-2 vs. control | HA-BMP-2 vs. HA    | HA vs. control            | HA-BMP-2 vs. control | HA-BMP-2 vs. HA    |                              |                         |                         |                              |                  |                         |                              |
| <b>BMD [%]</b><br>(area 1)          | P ( $\eta^2$ )            | 0.318                       | <b>0.001</b>         | 0.069              | n.a.                      | n.a.                 | n.a.               | <b>0.001</b><br>(0.285)      | 0.085<br>(0.135)        | 0.463<br>(0.026)        | n.a.                         | 0.154<br>(0.085) | 0.437<br>(0.039)        | n.a.                         |
|                                     | Est. $\Delta$ vs. Ctr./HA | 3.162                       | 7.678                | 4.515              | n.a.                      | n.a.                 | n.a.               |                              | -3.883                  | 1.605                   | n.a.                         |                  |                         |                              |
|                                     | Confidence interval (95%) | -1.605 to 7.929             | 2.911 to 12.444      | -0.252 to 9.282    | n.a.                      | n.a.                 | n.a.               |                              | -8.346 to 0.579         | -2.858 to 6.067         | n.a.                         |                  |                         |                              |
| <b>BV/TV [%]</b>                    | P ( $\eta^2$ )            | <b>&lt; 0.001</b>           | <b>&lt; 0.001</b>    | <b>&lt; 0.001</b>  | <b>&lt; 0.001</b>         | <b>&lt; 0.001</b>    | <b>0.032</b>       | <b>&lt; 0.001</b><br>(0.749) | 0.081<br>(0.152)        | 0.184<br>(0.091)        | <b>&lt; 0.001</b><br>(0.551) | 0.745<br>(0.006) | 0.435<br>(0.016)        | <b>&lt; 0.001</b><br>(0.375) |
|                                     | Est. $\Delta$ vs. Ctr./HA | 15.202                      | 27.011               | 11.809             | 3.300                     | 10.760               | 7.460              |                              | -3.076                  | -2.311                  | -9.810                       |                  |                         |                              |
|                                     | Confidence interval (95%) | 12.199 to 18.205            | 24.008 to 30.014     | 8.806 to 14.812    | 0.297 to 6.304            | 7.757 to 13.763      | 4.456 to 10.463    |                              | -6.567 to 0.415         | -5.816 to 1.194         | 0.076 to -11.544             |                  |                         |                              |
| <b>Tb.Th [<math>\mu</math>m]</b>    | P ( $\eta^2$ )            | <b>&lt; 0.001</b>           | <b>&lt; 0.001</b>    | <b>&lt; 0.001</b>  | 0.128                     | <b>&lt; 0.001</b>    | <b>&lt; 0.001</b>  | <b>&lt; 0.001</b><br>(0.730) | 0.335<br>(0.049)        | 0.069<br>(0.163)        | <b>&lt; 0.001</b><br>(0.629) | 0.494<br>(0.014) | <b>0.036</b><br>(0.064) | <b>&lt; 0.001</b><br>(0.442) |
|                                     | Est. $\Delta$ vs. Ctr./HA | 106.277                     | 213.938              | 107.661            | 18.417                    | 65.571               | 47.101             |                              | -15.266                 | -29.807                 | -89.039                      |                  |                         |                              |
|                                     | Confidence interval (95%) | 82.413 to 130.140           | 190.075 to 237.802   | 83.798 to 130.140  | -5.393 to 42.334          | 41.708 to 89.435     | 23.237 to 70964    |                              | -47.546 to 17.013       | -62.221 to 2.607        | -75.261 to -102.816          |                  |                         |                              |
| <b>Cort. Th [<math>\mu</math>m]</b> | P ( $\eta^2$ )            | 0.054                       | <b>0.002</b>         | 0.243              | <b>0.014</b>              | <b>0.007</b>         | 0.795              | <b>&lt; 0.001</b><br>(0.160) | 0.185<br>(0.090)        | <b>0.011</b><br>(0.291) | <b>0.001</b><br>(0.114)      | 0.231<br>(0.029) | 0.631<br>(0.009)        | 0.830<br>(0.004)             |
|                                     | Est. $\Delta$ vs. Ctr./HA | 103.586                     | 165.137              | 61.551             | 131.600                   | 145.478              | 13.878             |                              | 93.901                  | 192.360                 | -107.773                     |                  |                         |                              |
|                                     | Confidence interval (95%) | -1.869 to 209.041           | 59.682 to 270.592    | -42.482 to 165.584 | 27.567 to 235.633         | 40.023 to 250.933    | -91.577 to 119.333 |                              | -49.025 to 236.827      | 48.871 to 335.849       | -168.387 to -47.159          |                  |                         |                              |
| <b>Ob.S/BS [%]</b>                  | P ( $\eta^2$ )            | <b>0.004</b>                | <b>&lt; 0.001</b>    | 0.141              | 0.466                     | 0.051                | 0.215              | <b>&lt; 0.001</b><br>(0.164) | <b>0.006</b><br>(0.340) | <b>0.047</b><br>(0.192) | 0.906<br>(0.000)             | 0.115<br>(0.042) | 0.122<br>(0.041)        | 0.149<br>(0.037)             |
|                                     | Est. $\Delta$ vs. Ctr./HA | 0.739                       | 1.108                | 0.369              | 0.182                     | 0.493                | 0.310              |                              | 1.193                   | -0.814                  | -0.017                       |                  |                         |                              |
|                                     | Confidence interval (95%) | 0.245 to 1.233              | 0.614 to 1.602       | -0.125 to 0.863    | -0.312 to 0.676           | -0.001 to 0.987      | -0.183 to 0.804    |                              | 0.395 to 1.991          | -1.615 to -0.012        | -0.302 to 0.268              |                  |                         |                              |
| <b>OS/BS [%]</b>                    | P ( $\eta^2$ )            | <b>0.014</b>                | <b>0.001</b>         | 0.303              | 0.509                     | 0.071                | 0.509              | <b>0.002</b><br>(0.137)      | 0.212<br>(0.096)        | 0.131<br>(0.136)        | <b>0.045</b><br>(0.046)      | 0.597<br>(0.012) | 0.433<br>(0.019)        | 0.357<br>(0.024)             |
|                                     | Est. $\Delta$ vs. Ctr./HA | 7.947                       | 11.236               | 3.288              | 2.104                     | 5.795                | 3.691              |                              | -5.565                  | -6.802                  | -3.761                       |                  |                         |                              |
|                                     | Confidence interval (95%) | 1.641 to 14.253             | 4.930 to 17.541      | -3.017 to 9.594    | -4.201 to 8.410           | -0.511 to 12.101     | -2.615 to 9.996    |                              | -14.635 to 3.504        | -15.871 to 2.268        | -7.402 to -0.121             |                  |                         |                              |
| <b>MS/BS [X]</b><br>(area 1)        | P ( $\eta^2$ )            | 0.083                       | 1.000                | <b>0.017</b>       | n.a.                      | n.a.                 | n.a.               | <b>0.015</b><br>(0.260)      | 0.746<br>(0.008)        | 0.283<br>(0.082)        | n.a.                         | 0.507<br>(0.047) | 0.289<br>(0.085)        | n.a.                         |
|                                     | Est. $\Delta$ vs. Ctr./HA | -3.668                      | 1.051                | 4.718              | n.a.                      | n.a.                 | n.a.               |                              | 1.322                   | -4.470                  | n.a.                         |                  |                         |                              |
|                                     | Confidence interval (95%) | -7.689 to 0.353             | -2.970 to 5.071      | 0.698 to 8.739     | n.a.                      | n.a.                 | n.a.               |                              | -7.262 to 9.906         | -13.054 to 4.114        | n.a.                         |                  |                         |                              |
| <b>MAR [X]</b><br>(area 1)          | P ( $\eta^2$ )            | <b>0.043</b>                | 1.000                | <b>0.014</b>       | n.a.                      | n.a.                 | n.a.               | <b>0.015</b><br>(0.259)      | <b>0.038</b><br>(0.273) | 0.220<br>(0.105)        | n.a.                         | 0.926<br>(0.005) | 0.814<br>(0.015)        | n.a.                         |
|                                     | Est. $\Delta$ vs. Ctr./HA | -2.471                      | 0.417                | 2.888              | n.a.                      | n.a.                 | n.a.               |                              | 3.431                   | -1.924                  | n.a.                         |                  |                         |                              |
|                                     | Confidence interval (95%) | -4.879 to -0.063            | -1.991 to 2.825      | 0.480 to 5.296     | n.a.                      | n.a.                 | n.a.               |                              | 0.219 to 6.643          | -5.163 to 1.288         | n.a.                         |                  |                         |                              |
| <b>BFR/BS [X]</b><br>(area 1)       | P ( $\eta^2$ )            | <b>0.030</b>                | 1.000                | <b>0.019</b>       | n.a.                      | n.a.                 | n.a.               | <b>0.012</b><br>(0.270)      | 0.064<br>(0.224)        | 0.107<br>(0.175)        | n.a.                         | 0.732<br>(0.022) | 0.219<br>(0.103)        | n.a.                         |
|                                     | Est. $\Delta$ vs. Ctr./HA | -0.540                      | 0.036                | 0.576              | n.a.                      | n.a.                 | n.a.               |                              | 0.923                   | -0.791                  | n.a.                         |                  |                         |                              |
|                                     | Confidence interval (95%) | -1.039 to -0.041            | -0.463 to 0.535      | 0.077 to 1.075     | n.a.                      | n.a.                 | n.a.               |                              | -0.062 to 1.908         | -1.776 to 0.195         | n.a.                         |                  |                         |                              |
| <b>ES/BS [%]</b>                    | P ( $\eta^2$ )            | 0.251                       | 0.354                | 0.823              | 0.833                     | 0.436                | 0.569              | 0.774<br>(0.006)             | <b>0.030</b><br>(0.262) | 0.528<br>(0.025)        | 0.556<br>(0.004)             | 0.663<br>(0.010) | <b>0.038</b><br>(0.073) | 0.442<br>(0.019)             |
|                                     | Est. $\Delta$ vs. Ctr./HA | 0.401                       | 0.323                | -0.078             | -0.074                    | -0.272               | -0.198             |                              | -0.707                  | 0.191                   | 0.118                        |                  |                         |                              |
|                                     | Confidence interval (95%) | -0.289 to 1.091             | -0.367 to 1.013      | -0.768 to 0.612    | -0.764 to 0.616           | -0.962 to 0.418      | -0.888 to 0.492    |                              | -1.336 to -0.078        | -0.438 to 0.820         | -0.280 to 0.516              |                  |                         |                              |

| Parameter              |                           | Treatment (adjacent area 1) |                      |                    | Treatment (remote area 2) |                      |                   | group              | time               | dose               | area                | group*time       | group*dose       | group * area       |
|------------------------|---------------------------|-----------------------------|----------------------|--------------------|---------------------------|----------------------|-------------------|--------------------|--------------------|--------------------|---------------------|------------------|------------------|--------------------|
|                        |                           | HA vs. control              | HA-GDF-5 vs. control | HA-GDF-5 vs. HA    | HA vs. control            | HA-GDF-5 vs. control | HA-GDF-5 vs. HA   |                    |                    |                    |                     |                  |                  |                    |
| BMD [%]<br>(area 1)    | P<br>( $\eta^2$ )         | 1.000                       | < 0.001              | 0.003              | n.a.                      | n.a.                 | n.a.              | < 0.001<br>(0.332) | 0.302<br>(0.051)   | 0.315<br>(0.048)   | n.a.                | 0.672<br>(0.019) | 0.327<br>(0.052) | n.a.               |
|                        | Est. $\Delta$ vs. Ctr./HA | 1.045                       | 6.011                | 4.966              | n.a.                      | n.a.                 | n.a.              |                    | -1.406             | -1.368             | n.a.                |                  |                  |                    |
|                        | Confidence interval (95%) | -2.412 to 4.503             | 2.554 to 9.468       | 1.509 to 8.423     | n.a.                      | n.a.                 | n.a.              |                    | -4.168 to 1.355    | -4.129 to 1.394    | n.a.                |                  |                  |                    |
| BV/TV [%]              | P<br>( $\eta^2$ )         | < 0.001                     | < 0.001              | < 0.001            | < 0.001                   | < 0.001              | 0.032             | < 0.001<br>(0.805) | < 0.001<br>(0.662) | 0.185<br>(0.090)   | < 0.001<br>(0.754)  | 0.615<br>(0.010) | 0.113<br>(0.042) | < 0.001<br>(0.624) |
|                        | Est. $\Delta$ vs. Ctr./HA | 16.251                      | 30.968               | 14.717             | 0.711                     | 7.325                | 6.614             |                    | 5.633              | -1.274             | -13.347             |                  |                  |                    |
|                        | Confidence interval (95%) | 13.629 to 18.873            | 28.346 to 33.590     | 12.096 to 17.339   | -1.911 to 3.333           | 4.703 to 9.947       | 3.992 to 9.236    |                    | 3.701 to 7.566     | -3.214 to 0.667    | -14.861 to -11.834  |                  |                  |                    |
| Tb.Th [ $\mu$ m]       | P<br>( $\eta^2$ )         | < 0.001                     | < 0.001              | < 0.001            | 0.771                     | 0.003                | 0.007             | < 0.001<br>(0.664) | < 0.001<br>(0.633) | 0.404<br>(0.037)   | < 0.001<br>(0.625)  | 0.013<br>(0.082) | 0.298<br>(0.024) | < 0.001<br>(0.486) |
|                        | Est. $\Delta$ vs. Ctr./HA | 114.489                     | 251.060              | 136.571            | 4.479                     | 46.840               | 42.361            |                    | 64.086             | -9.597             | -110.937            |                  |                  |                    |
|                        | Confidence interval (95%) | 84.108 to 144.879           | 220.679 to 281.441   | 106.190 to 166.952 | -25.902 to 34.860         | 16.459 to 77.221     | 11.980 to 72.742  |                    | 40.660 to 87.512   | -33.120 to 13.927  | -128.478 to -93.369 |                  |                  |                    |
| Cort. Th [ $\mu$ m]    | P<br>( $\eta^2$ )         | 0.001                       | < 0.001              | < 0.001            | 0.238                     | < 0.001              | 0.007             | < 0.001<br>(0.363) | 0.613<br>(0.014)   | 0.383<br>(0.040)   | < 0.001<br>(0.199)  | 0.520<br>(0.013) | 0.222<br>(0.029) | 0.131<br>(0.039)   |
|                        | Est. $\Delta$ vs. Ctr./HA | 121.545                     | 243.133              | 121.587            | 43.280                    | 143.407              | 100.127           |                    | 24.924             | 43.456             | -105.446            |                  |                  |                    |
|                        | Confidence interval (95%) | 49.171 to 193.920           | 170.758 to 315.507   | 49.213 to 193.920  | -29.095 to 115.655        | 71.033 to 215.782    | 27.753 to 172.502 |                    | -76.577 to 126.425 | -58.467 to 145.378 | -147.232 to -63.661 |                  |                  |                    |
| Ob.S/BS [%]            | P<br>( $\eta^2$ )         | 0.070                       | 0.003                | 0.250              | 0.808                     | 0.106                | 0.168             | 0.006<br>(0.097)   | 0.001<br>(0.420)   | 0.530<br>(0.021)   | < 0.001<br>(0.189)  | 0.116<br>(0.042) | 0.651<br>(0.008) | 0.477<br>(0.015)   |
|                        | Est. $\Delta$ vs. Ctr./HA | 0.631                       | 1.030                | 0.399              | 0.084                     | 0.562                | 0.478             |                    | 1.557              | 0.270              | -0.959              |                  |                  |                    |
|                        | Confidence interval (95%) | -0.052 to 1.315             | 0.347 to 1.713       | -0.285 to 1.082    | -0.599 to 0.767           | -0.121 to 1.245      | -0.205 to 1.161   |                    | 0.679 to 2.436     | -0.612 to 1.151    | -1.354 to -0.565    |                  |                  |                    |
| OS/BS [%]              | P<br>( $\eta^2$ )         | < 0.001                     | < 0.001              | 0.178              | 0.283                     | 0.105                | 0.579             | < 0.001<br>(0.274) | < 0.001<br>(0.763) | 0.227<br>(0.076)   | < 0.001<br>(0.188)  | 0.005<br>(0.098) | 0.728<br>(0.006) | 0.003<br>(0.107)   |
|                        | Est. $\Delta$ vs. Ctr./HA | 11.965                      | 15.397               | 3.431              | 2.733                     | 4.141                | 1.408             |                    | -12.956            | -2.060             | -6.830              |                  |                  |                    |
|                        | Confidence interval (95%) | 6.948 to 16.983             | 10.379 to 20.414     | -1.586 to 8.449    | -2.285 to 7.750           | -0.877 to 9.158      | -3.609 to 6.426   |                    | -16.421 to -9.490  | -5.511 to 1.391    | -9.726 to -3.933    |                  |                  |                    |
| MS/BS [X]<br>(area 1)  | P<br>( $\eta^2$ )         | 1.000                       | 1.000                | 1.000              | n.a.                      | n.a.                 | n.a.              | 0.629<br>(0.025)   | < 0.001<br>(0.679) | 0.577<br>(0.018)   | n.a.                | 0.668<br>(0.022) | 0.293<br>(0.066) | n.a.               |
|                        | Est. $\Delta$ vs. Ctr./HA | 0.228                       | 0.703                | 0.475              | n.a.                      | n.a.                 | n.a.              |                    | 11.331             | 1.033              | n.a.                |                  |                  |                    |
|                        | Confidence interval (95%) | -1.847 to 2.303             | -1.373 to 2.778      | -1.601 to 2.550    | n.a.                      | n.a.                 | n.a.              |                    | 7.471 to 15.192    | -2.792 to 4.859    | n.a.                |                  |                  |                    |
| MAR [X]<br>(area 1)    | P<br>( $\eta^2$ )         | 1.000                       | < 0.001              | < 0.001            | n.a.                      | n.a.                 | n.a.              | < 0.001<br>(0.310) | 0.001<br>(0.194)   | 0.047<br>(0.071)   | n.a.                | 0.643<br>(0.016) | 0.061<br>(0.098) | n.a.               |
|                        | Est. $\Delta$ vs. Ctr./HA | 0.069                       | 2.729                | 2.660              | n.a.                      | n.a.                 | n.a.              |                    | 1.859              | 1.038              | n.a.                |                  |                  |                    |
|                        | Confidence interval (95%) | -1.508 to 1.647             | 1.152 to 4.307       | 1.083 to 4.238     | n.a.                      | n.a.                 | n.a.              |                    | 0.801 to 2.918     | -0.010 to 2.087    | n.a.                |                  |                  |                    |
| BFR/BS [X]<br>(area 1) | P<br>( $\eta^2$ )         | 1.000                       | 0.003                | 0.002              | n.a.                      | n.a.                 | n.a.              | 0.002<br>(0.298)   | < 0.001<br>(0.602) | 0.194<br>(0.092)   | n.a.                | 0.776<br>(0.014) | 0.435<br>(0.045) | n.a.               |
|                        | Est. $\Delta$ vs. Ctr./HA | -0.002                      | 0.246                | 0.248              | n.a.                      | n.a.                 | n.a.              |                    | 0.507              | 0.130              | n.a.                |                  |                  |                    |
|                        | Confidence interval (95%) | -0.173 to 0.169             | 0.075 to 0.417       | 0.077 to 0.419     | n.a.                      | n.a.                 | n.a.              |                    | 0.303 to 0.711     | -0.072 to 0.332    | n.a.                |                  |                  |                    |
| ES/BS [%]              | P<br>( $\eta^2$ )         | 0.424                       | 0.338                | 0.873              | 0.562                     | 0.377                | 0.145             | 0.514<br>(0.013)   | 0.001<br>(0.472)   | 0.637<br>(0.012)   | 0.420<br>(0.006)    | 0.572<br>(0.011) | 0.420<br>(0.017) | 0.368<br>(0.020)   |
|                        | Est. $\Delta$ vs. Ctr./HA | -0.229                      | -0.275               | -0.046             | -0.166                    | 0.254                | 0.420             |                    | -0.979             | -0.113             | 0.134               |                  |                  |                    |
|                        | Confidence interval (95%) | -0.796 to 0.337             | -0.841 to 0.292      | -0.612 to 0.521    | -0.733 to 0.400           | -0.313 to 0.820      | -0.147 to 0.986   |                    | -1.476 to -0.482   | -0.608 to 0.381    | -0.193 to 0.461     |                  |                  |                    |

Bone mineral density (BMD); bone volume/total volume (BV/TV); trabecular thickness (Tb.Th); osteoblast surface (Ob.S/BS); osteoid surface (OS/BS); cortical thickness (Cort. Th); mineralizing surface per bone surface (MS/BS); mineral apposition rate (MAR); bone formation rate surface-based BFR/BS; and eroded surface (ES/BS);  $\eta_p^2$  = partial eta squared; Est.  $\Delta$  vs. Ctr./HA = estimate  $\Delta$  compared to control/HA; HA = hydroxyapatite particles; BMP-2 = bone morphogenetic protein-2; GDF-5 = growth/differentiation factor-5; n.a. = not applicable; a linear mixed effects model was fitted to compare the effects of treatment (group), time point after treatment (time), BMP dose (dose), and distance from the injection channel (area), as well as the interactions (\*) between group on one hand and the parameters time, dose, and area on the other hand, on the nine different static and dynamic histomorphometrical parameters. In this analysis, group, time, dose, and area were modeled as fixed effects with a random intercept per sheep, in order to account for multiple measurements per sheep and the correlation of these observations.  $\eta_p^2$  from the model was used to assess the effect size (classification:  $0.01 \leq \eta_p^2 < 0.06$  – small effect size;  $0.06 \leq \eta_p^2 < 0.14$  – medium effect size;  $\eta_p^2 \geq 0.14$  – large effect size; color coding applied to columns 9 to 15). The same color coding is applied in columns 3 to 8 for  $P \leq 0.05$ ;  $\leq 0.01$ ;  $< 0.001$ .
