# Supplementary material for: Single Application of Low-Dose, Hydroxyapatite-Bound BMP-2 or GDF-5 Induces Long-Term Bone Formation and Biomechanical Stabilization of a Bone Defect in a Senile Sheep Lumbar Osteopenia Model
Source: MDPI journal article supplement (doi:10.3390/biomedicines10020513), 2022-02-21
Supplement: s1 [file s1]

**Supplementary Table S1:** Differences among the release of different doses of BMPs from the HA particles (BMP-2; GDF-5; n = triplicates each).

|                   |                         | BMP-2 (2 µg)  |       |       |       |       |       |       |       |       |       |              | GDF-5 (10 µg)  |       |       |       |       |       |       |       |       |       |              |
|-------------------|-------------------------|---------------|-------|-------|-------|-------|-------|-------|-------|-------|-------|--------------|----------------|-------|-------|-------|-------|-------|-------|-------|-------|-------|--------------|
| Time point (days) |                         | 0.5 h         | 1 h   | 4 h   | 6 h   | 1     | 2     | 4     | 7     | 9     | 11    | 14           | 0.5 h          | 1 h   | 4 h   | 6 h   | 1     | 2     | 4     | 7     | 9     | 11    | 14           |
| PBS               | Release/d (ng/ml)       | 0.36          | 0.40  | 0.28  | 0.31  | 0.31  | 0.38  | 0.43  | 0.42  | 0.41  | 0.37  | 0.37         | 8.63           | 13.32 | 18.95 | 12.71 | 14.83 | 20.05 | 14.10 | 9.82  | 8.68  | 5.75  | 7.05         |
|                   | Cumulative Release (ng) | 0.36          | 0.76  | 1.03  | 1.34  | 1.65  | 2.03  | 2.46  | 2.88  | 3.30  | 3.66  | <b>4.03</b>  | 8.63           | 21.95 | 40.90 | 53.61 | 68.44 | 88.49 | 102.6 | 112.4 | 121.1 | 126.8 | <b>133.9</b> |
|                   | Release (%)             | 0.02          | 0.04  | 0.05  | 0.07  | 0.08  | 0.10  | 0.12  | 0.14  | 0.16  | 0.18  | 0.20         | 0.09           | 0.22  | 0.41  | 0.54  | 0.68  | 0.88  | 1.03  | 1.12  | 1.21  | 1.27  | 1.34         |
|                   | Retention (%)           | 100.0         | 100.0 | 99.9  | 99.9  | 99.9  | 99.9  | 99.9  | 99.9  | 99.8  | 99.8  | 99.8         | 99.91          | 99.78 | 99.59 | 99.46 | 99.32 | 99.12 | 98.97 | 98.88 | 98.79 | 98.73 | 98.66        |
|                   |                         | BMP-2 (20 µg) |       |       |       |       |       |       |       |       |       |              | GDF-5 (100 µg) |       |       |       |       |       |       |       |       |       |              |
| PBS               | Release/d (ng/ml)       | 0.85          | 0.91  | 0.91  | 0.92  | 1.02  | 0.90  | 0.87  | 0.75  | 0.92  | 1.04  | 0.96         | 22.95          | 33.54 | 33.41 | 32.22 | 40.13 | 56.24 | 36.04 | 43.18 | 35.35 | 24.74 | 28.86        |
|                   | Cumulative Release (ng) | 0.85          | 1.76  | 2.67  | 3.58  | 4.60  | 5.50  | 6.37  | 7.12  | 8.04  | 9.08  | <b>10.04</b> | 22.95          | 56.49 | 89.90 | 122.1 | 162.3 | 218.5 | 254.5 | 297.7 | 333.1 | 357.8 | <b>386.7</b> |
|                   | Release (%)             | 0.00          | 0.01  | 0.01  | 0.02  | 0.02  | 0.03  | 0.03  | 0.04  | 0.04  | 0.05  | 0.05         | 0.02           | 0.06  | 0.09  | 0.12  | 0.16  | 0.22  | 0.25  | 0.30  | 0.33  | 0.36  | 0.39         |
|                   | Retention (%)           | 100.0         | 99.99 | 99.99 | 99.98 | 99.98 | 99.97 | 99.97 | 99.96 | 99.96 | 99.95 | 99.95        | 99.98          | 99.94 | 99.91 | 99.88 | 99.84 | 99.78 | 99.75 | 99.70 | 99.67 | 99.64 | 99.61        |
|                   |                         | BMP-2 (2 µg)  |       |       |       |       |       |       |       |       |       |              | GDF-5 (10 µg)  |       |       |       |       |       |       |       |       |       |              |
| Time point (days) |                         | 0.5 h         | 1 h   | 4 h   | 6 h   | 1     | 2     | 4     | 7     | 9     | 11    | 14           | 0.5 h          | 1 h   | 4 h   | 6 h   | 1     | 2     | 4     | 7     | 9     | 11    | 14           |
| Serum             | Release (ng/ml)         | 720.7         | 335.0 | 213.9 | 107.9 | 101.8 | 40.03 | 26.52 | 15.99 | 8.70  | 6.50  | 4.88         | 4423           | 1572  | 1106  | 580.6 | 431.7 | 251.9 | 136.6 | 99.60 | 30.39 | 19.97 | 16.72        |
|                   | Cumulative Release (ng) | 720.7         | 1056  | 1270  | 1377  | 1479  | 1519  | 1546  | 1562  | 1570  | 1577  | <b>1582</b>  | 4423           | 5995  | 7101  | 7682  | 8113  | 8365  | 8502  | 8601  | 8632  | 8652  | <b>8668</b>  |
|                   | Release (%)             | 36.03         | 52.78 | 63.48 | 68.87 | 73.96 | 75.96 | 77.28 | 78.08 | 78.52 | 78.84 | 79.09        | 44.23          | 59.95 | 71.01 | 76.82 | 81.13 | 83.65 | 85.02 | 86.01 | 86.32 | 86.52 | 86.68        |
|                   | Retention (%)           | 63.96         | 47.22 | 36.52 | 31.13 | 26.04 | 24.04 | 22.72 | 21.92 | 21.48 | 21.16 | 20.91        | 55.77          | 40.05 | 28.99 | 23.18 | 18.87 | 16.35 | 14.98 | 13.99 | 13.68 | 13.48 | 13.32        |
|                   |                         | BMP-2 (20 µg) |       |       |       |       |       |       |       |       |       |              | GDF-5 (100 µg) |       |       |       |       |       |       |       |       |       |              |
| Serum             | Release (ng/ml)         | 4674          | 4494  | 3841  | 2103  | 2391  | 1097  | 751.7 | 496.9 | 146.8 | 128.3 | 80.74        | 11431          | 6389  | 10353 | 4986  | 8631  | 8444  | 7127  | 6049  | 5134  | 4121  | 3426         |
|                   | Cumulative Release (ng) | 4674          | 9168  | 13009 | 15112 | 17503 | 18600 | 19352 | 19849 | 19995 | 20124 | <b>20204</b> | 11326          | 19560 | 28173 | 33159 | 41790 | 50234 | 57361 | 63410 | 68544 | 72665 | <b>76092</b> |
|                   | Release (%)             | 23.37         | 45.84 | 65.05 | 75.56 | 87.52 | 93.00 | 96.76 | 99.24 | 99.98 | 100   | 100          | 11.43          | 17.82 | 28.17 | 33.16 | 41.79 | 50.23 | 57.36 | 63.41 | 68.54 | 72.67 | 76.09        |
|                   | Retention (%)           | 76.63         | 54.16 | 34.95 | 24.44 | 12.48 | 7.00  | 3.24  | 0.76  | 0.02  | 0.00  | 0.00         | 88.57          | 82.18 | 71.83 | 66.84 | 58.21 | 49.77 | 42.64 | 36.59 | 31.46 | 27.33 | 23.91        |
