# Supplementary material for: Single Application of Low-Dose, Hydroxyapatite-Bound BMP-2 or GDF-5 Induces Long-Term Bone Formation and Biomechanical Stabilization of a Bone Defect in a Senile Sheep Lumbar Osteopenia Model
Source: Biomedicines. 2022 Feb 21;10(2):513. doi: 10.3390/biomedicines10020513 (PMC8962316; doi:10.3390/biomedicines10020513)
Supplement: Supplementary file 1 [file biomedicines-10-00513-s001.zip]

Archive with 4 entries (4 files):
- Suppl Fig S1.pdf
- Suppl Fig S2_S3.pptx
- Supplementary_Table_1.pdf
- Supplementary_Table_2_GLM_BMP2_16_02_22_mit_CI_Version_2.pdf
